# Supplementary material for: Test-retest reliability of FreeSurfer-derived volume, area and cortical thickness from MPRAGE and MP2RAGE brain MRI images
Source: PubMed Central journal article supplement — Neuroimage Rep. 2022 Feb 24;2(2):100086. doi: 10.1016/j.ynirp.2022.100086 (PMC9409374; doi:10.1016/j.ynirp.2022.100086), 2022-02-24

## Supplementary Material

**Supplementary Figure 1. MPRAGE and MP2RAGE images and FreeSurfer outputs.** MPRAGE acquired on a Siemens Trio (12-channel head coil) (A) and the resulting FreeSurfer output (aparc+aseg.mgz) (B) and the same subject's MP2RAGE acquired on a Siemens Prisma (64-channel head coil) (C) and the resulting FreeSurfer output (D).

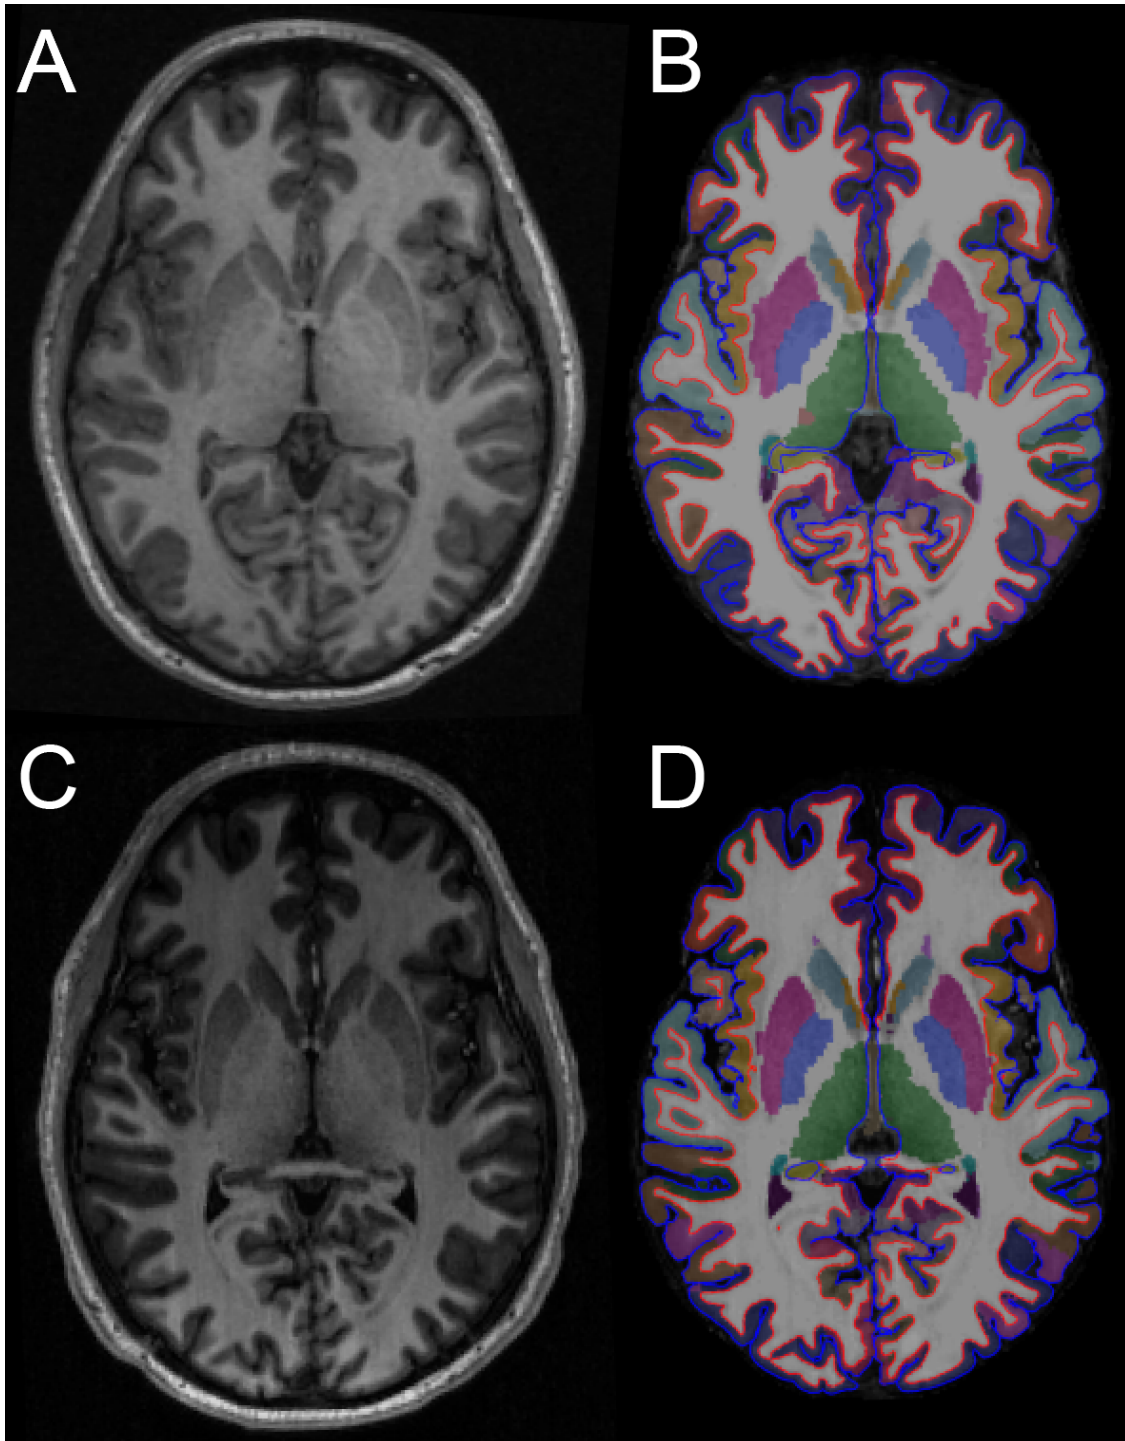

**Supplementary Figure 2. Bland-Altman plots for average brain measures acquired using MPRAGE and MP2RAGE sequences. Difference scores represent Trio MPRAGE – Prisma MP2RAGE.**

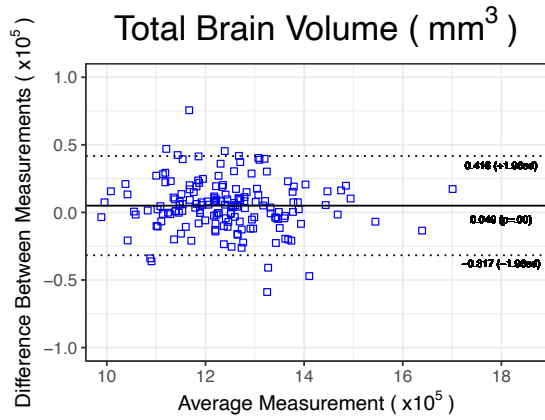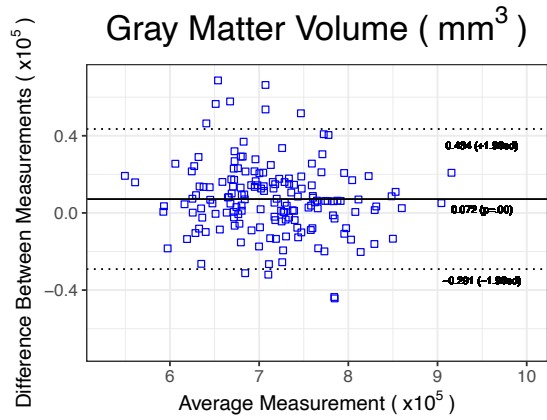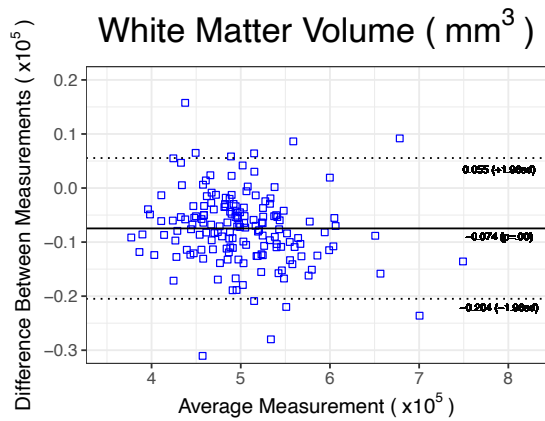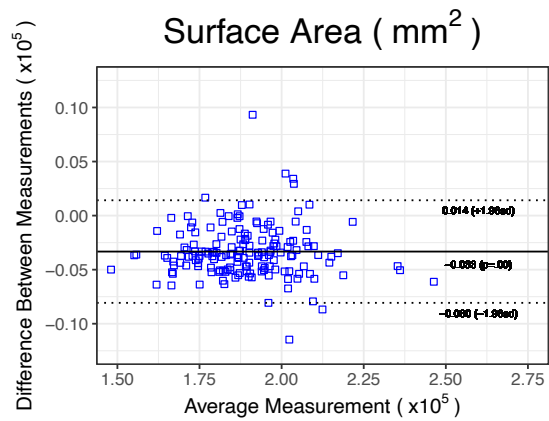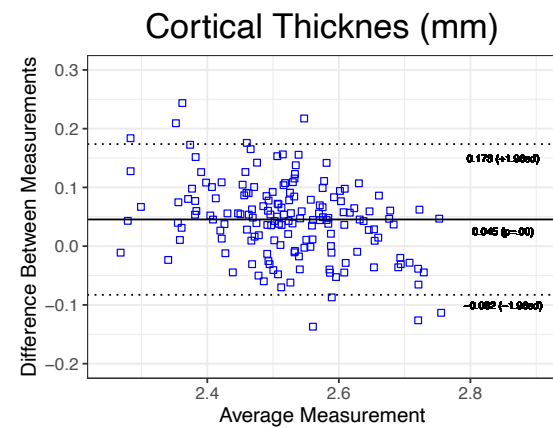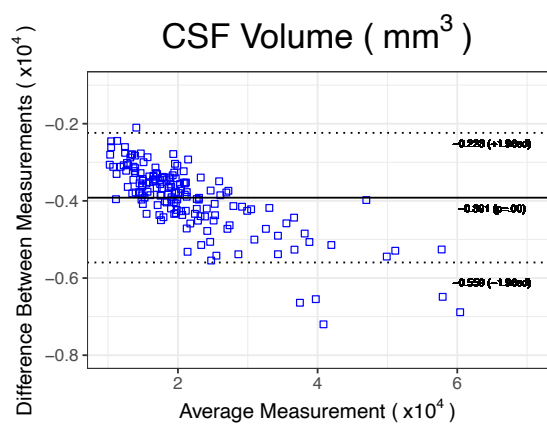

**Supplementary Table 1. Intraclass correlation coefficient values for FreeSurfer derived cortical regions of interest**

| Region                   | Area (Left) | Area (Right) | Area Mean | Volume (Left) | Volume (Right) | Volume Mean | Thickness (Left) | Thickness (Right) | Thickness Mean |
|--------------------------|-------------|--------------|-----------|---------------|----------------|-------------|------------------|-------------------|----------------|
| Bankssts                 | 0.92        | 0.96         | 0.94      | 0.91          | 0.92           | 0.91        | 0.69             | 0.59              | 0.64           |
| Caudalanteriorcingulate  | 0.95        | 0.94         | 0.95      | 0.95          | 0.96           | 0.96        | 0.64             | 0.73              | 0.69           |
| Caudalmiddlefrontal      | 0.96        | 0.95         | 0.96      | 0.95          | 0.94           | 0.94        | 0.74             | 0.71              | 0.72           |
| Cuneus                   | 0.97        | 0.95         | 0.96      | 0.91          | 0.88           | 0.89        | 0.69             | 0.74              | 0.72           |
| Entorhinal               | 0.83        | 0.83         | 0.83      | 0.67          | 0.76           | 0.71        | 0.58             | 0.65              | 0.62           |
| Frontalpole              | 0.65        | 0.70         | 0.68      | 0.57          | 0.64           | 0.60        | 0.35             | 0.47              | 0.41           |
| Fusiform                 | 0.97        | 0.96         | 0.96      | 0.93          | 0.94           | 0.93        | 0.60             | 0.72              | 0.66           |
| Inferiorparietal         | 0.97        | 0.97         | 0.97      | 0.92          | 0.94           | 0.93        | 0.70             | 0.53              | 0.61           |
| Inferiortemporal         | 0.96        | 0.97         | 0.97      | 0.92          | 0.92           | 0.92        | 0.52             | 0.48              | 0.50           |
| Insula                   | 0.68        | 0.62         | 0.65      | 0.82          | 0.78           | 0.80        | 0.55             | 0.57              | 0.56           |
| Isthmuscingulate         | 0.93        | 0.92         | 0.93      | 0.96          | 0.96           | 0.96        | 0.74             | 0.72              | 0.73           |
| Lateraloccipital         | 0.96        | 0.97         | 0.96      | 0.84          | 0.93           | 0.88        | 0.75             | 0.64              | 0.70           |
| Lateralorbitofrontal     | 0.88        | 0.80         | 0.84      | 0.89          | 0.82           | 0.86        | 0.60             | 0.57              | 0.59           |
| Lingual                  | 0.96        | 0.95         | 0.96      | 0.93          | 0.92           | 0.92        | 0.61             | 0.72              | 0.67           |
| Medialorbitofrontal      | 0.76        | 0.88         | 0.82      | 0.79          | 0.88           | 0.83        | 0.74             | 0.74              | 0.74           |
| Middletemporal           | 0.96        | 0.96         | 0.96      | 0.91          | 0.89           | 0.90        | 0.53             | 0.46              | 0.50           |
| Paracentral              | 0.94        | 0.95         | 0.95      | 0.84          | 0.89           | 0.87        | 0.76             | 0.74              | 0.75           |
| Parahippocampal          | 0.90        | 0.90         | 0.90      | 0.88          | 0.87           | 0.87        | 0.80             | 0.85              | 0.83           |
| Parsopercularis          | 0.97        | 0.95         | 0.96      | 0.95          | 0.93           | 0.94        | 0.68             | 0.65              | 0.66           |
| Parsorbitalis            | 0.90        | 0.86         | 0.88      | 0.89          | 0.88           | 0.89        | 0.61             | 0.54              | 0.57           |
| Parstriangularis         | 0.96        | 0.94         | 0.95      | 0.95          | 0.93           | 0.94        | 0.70             | 0.68              | 0.69           |
| Pericalcarine            | 0.95        | 0.93         | 0.94      | 0.88          | 0.87           | 0.88        | 0.49             | 0.50              | 0.50           |
| Postcentral              | 0.94        | 0.93         | 0.94      | 0.81          | 0.87           | 0.84        | 0.70             | 0.70              | 0.70           |
| Posteriorcingulate       | 0.94        | 0.95         | 0.95      | 0.96          | 0.96           | 0.96        | 0.73             | 0.63              | 0.68           |
| Precentral               | 0.95        | 0.96         | 0.96      | 0.93          | 0.93           | 0.93        | 0.79             | 0.74              | 0.76           |
| Precuneus                | 0.98        | 0.98         | 0.98      | 0.95          | 0.96           | 0.95        | 0.74             | 0.68              | 0.71           |
| Rostralanteriorcingulate | 0.92        | 0.95         | 0.94      | 0.92          | 0.91           | 0.92        | 0.56             | 0.54              | 0.55           |
| Rostralmiddlefrontal     | 0.94        | 0.91         | 0.93      | 0.92          | 0.91           | 0.92        | 0.62             | 0.62              | 0.62           |
| Superiorfrontal          | 0.95        | 0.92         | 0.94      | 0.94          | 0.91           | 0.93        | 0.73             | 0.67              | 0.70           |
| Superiorparietal         | 0.96        | 0.95         | 0.95      | 0.85          | 0.86           | 0.85        | 0.71             | 0.74              | 0.72           |
| Superiortemporal         | 0.98        | 0.96         | 0.97      | 0.95          | 0.94           | 0.95        | 0.72             | 0.74              | 0.73           |
| Supramarginal            | 0.97        | 0.96         | 0.97      | 0.95          | 0.95           | 0.95        | 0.65             | 0.49              | 0.57           |
| Temporalpole             | 0.65        | 0.63         | 0.64      | 0.62          | 0.58           | 0.60        | 0.37             | 0.34              | 0.35           |
| Transversetemporal       | 0.95        | 0.91         | 0.93      | 0.94          | 0.88           | 0.91        | 0.83             | 0.79              | 0.81           |

**Supplementary Table 2. Mean percent difference values for FreeSurfer derived cortical regions of interest**

| Region                   | Area<br>(Left) | Area<br>(Right) | Area<br>Mean | Volume<br>(Left) | Volume<br>(Right) | Volume<br>Mean | Thickness<br>(Left) | Thickness<br>(Right) | Thickness<br>Mean |
|--------------------------|----------------|-----------------|--------------|------------------|-------------------|----------------|---------------------|----------------------|-------------------|
| Bankssts                 | 1.09           | 0.81            | 0.95         | 1.58             | 1.23              | 1.41           | 0.99                | 1.50                 | 1.09              |
| Caudalanteriorcingulate  | 1.43           | 1.50            | 1.47         | 1.32             | 1.29              | 1.30           | 1.46                | 1.21                 | 1.43              |
| Caudalmiddlefrontal      | 0.85           | 1.00            | 0.93         | 1.16             | 1.27              | 1.22           | 0.77                | 0.83                 | 0.85              |
| Cuneus                   | 0.64           | 0.76            | 0.70         | 1.71             | 1.81              | 1.76           | 1.28                | 1.08                 | 0.64              |
| Entorhinal               | 2.66           | 2.51            | 2.58         | 3.39             | 2.61              | 3.00           | 1.78                | 1.68                 | 2.66              |
| Frontalpole              | 1.68           | 2.04            | 1.86         | 2.92             | 2.68              | 2.80           | 2.06                | 2.05                 | 1.68              |
| Fusiform                 | 0.54           | 0.58            | 0.56         | 0.97             | 0.90              | 0.93           | 0.94                | 0.78                 | 0.54              |
| Inferiorparietal         | 0.79           | 0.67            | 0.73         | 1.31             | 0.96              | 1.14           | 0.83                | 1.21                 | 0.79              |
| Inferiortemporal         | 0.63           | 0.60            | 0.62         | 1.27             | 1.19              | 1.23           | 1.56                | 1.32                 | 0.63              |
| Insula                   | 1.56           | 2.03            | 1.79         | 1.19             | 1.49              | 1.34           | 1.12                | 1.06                 | 1.56              |
| Isthmuscingulate         | 1.19           | 1.22            | 1.21         | 0.87             | 0.94              | 0.91           | 1.15                | 1.23                 | 1.19              |
| Lateraloccipital         | 0.69           | 0.63            | 0.66         | 1.57             | 1.05              | 1.31           | 0.72                | 0.98                 | 0.69              |
| Lateralorbitofrontal     | 1.01           | 1.33            | 1.17         | 1.04             | 1.44              | 1.24           | 1.17                | 1.36                 | 1.01              |
| Lingual                  | 0.73           | 0.73            | 0.73         | 1.24             | 1.26              | 1.25           | 1.23                | 0.99                 | 0.73              |
| Medialorbitofrontal      | 1.69           | 1.05            | 1.37         | 1.77             | 1.28              | 1.53           | 0.95                | 1.10                 | 1.69              |
| Middletemporal           | 0.62           | 0.70            | 0.66         | 1.27             | 1.29              | 1.28           | 1.39                | 1.60                 | 0.62              |
| Paracentral              | 0.79           | 0.74            | 0.76         | 1.64             | 1.23              | 1.43           | 0.77                | 0.80                 | 0.79              |
| Parahippocampal          | 1.00           | 1.00            | 1.00         | 1.42             | 1.39              | 1.41           | 1.13                | 1.00                 | 1.00              |
| Parsopercularis          | 0.81           | 0.96            | 0.89         | 1.10             | 1.16              | 1.13           | 0.90                | 1.03                 | 0.81              |
| Parsorbitalis            | 1.11           | 1.38            | 1.24         | 1.42             | 1.41              | 1.42           | 1.37                | 1.58                 | 1.11              |
| Parstriangularis         | 0.86           | 0.98            | 0.92         | 1.13             | 1.22              | 1.18           | 0.96                | 1.01                 | 0.86              |
| Pericalcarine            | 1.06           | 1.20            | 1.13         | 2.07             | 2.00              | 2.04           | 2.11                | 1.97                 | 1.06              |
| Postcentral              | 0.71           | 0.72            | 0.71         | 1.80             | 1.54              | 1.67           | 0.83                | 0.86                 | 0.71              |
| Posteriorcingulate       | 0.92           | 0.96            | 0.94         | 0.82             | 0.96              | 0.89           | 1.03                | 1.23                 | 0.92              |
| Precentral               | 0.52           | 0.55            | 0.54         | 0.84             | 0.89              | 0.86           | 0.64                | 0.82                 | 0.52              |
| Precuneus                | 0.51           | 0.48            | 0.50         | 0.76             | 0.74              | 0.75           | 0.79                | 0.91                 | 0.51              |
| Rostralanteriorcingulate | 1.62           | 1.19            | 1.40         | 1.74             | 1.77              | 1.75           | 1.58                | 1.62                 | 1.62              |
| Rostralmiddlefrontal     | 0.98           | 1.15            | 1.06         | 1.20             | 1.26              | 1.23           | 0.93                | 0.92                 | 0.98              |
| Superiorfrontal          | 0.77           | 0.89            | 0.83         | 0.92             | 0.99              | 0.96           | 0.81                | 0.89                 | 0.77              |
| Superiorparietal         | 0.69           | 0.71            | 0.70         | 1.65             | 1.57              | 1.61           | 0.75                | 0.76                 | 0.69              |
| Superiortemporal         | 0.52           | 0.57            | 0.55         | 0.84             | 0.82              | 0.83           | 0.85                | 0.86                 | 0.52              |
| Supramarginal            | 0.71           | 0.64            | 0.68         | 1.05             | 0.90              | 0.98           | 1.01                | 1.44                 | 0.71              |
| Temporalpole             | 2.12           | 1.90            | 2.01         | 2.91             | 2.44              | 2.67           | 2.25                | 2.10                 | 2.12              |
| Transversetemporal       | 1.03           | 1.21            | 1.12         | 1.34             | 1.79              | 1.56           | 0.92                | 1.08                 | 1.03              |

**Supplementary Figure 3. ASD vs TDC regional differences in Area, Volume or Thickness for MPRAGE and MP2RAGE sequences.** In both sequences, decreased area and volume in right inferior temporal cortex and thinner insula was found in ASD. In the MPRAGE sequence, the ASD group had smaller area and volume in the left bank of the superior temporal sulcus and thinner left caudal anterior cingulate. In the MP2RAGE sequence, the ASD group showed smaller area and volume of bilateral middle temporal and rostral anterior cingulate, thinner left isthmus cingulate and thicker left medial orbitofrontal.

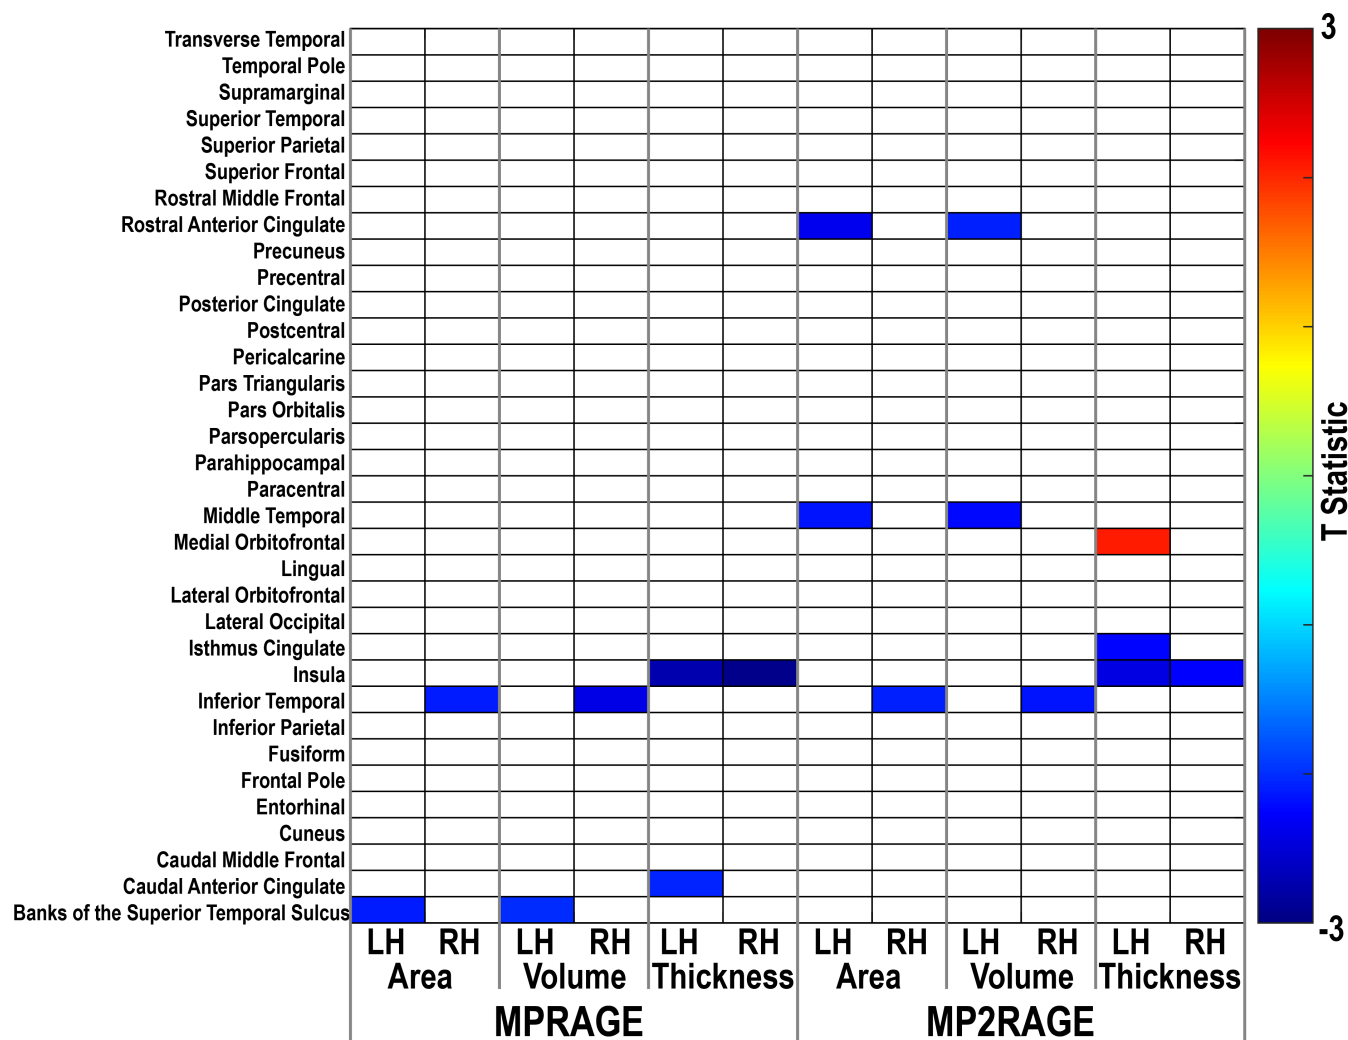

Supplement: NIHMS1824208-supplement-Supplementary_Material.pdf [file NIHMS1824208-supplement-Supplementary_Material.pdf]
